# Supplementary material
Source: publisher figshare collection journal article supplement (https://sage.figshare.com/ndownloader/files/14870180)
Supplement: Supplementary file 1 [file 14870180]

## Appendix A: Country selection

| Country     | Type of Democracy | Populist Party  | Orientation | Period                         |
|-------------|-------------------|-----------------|-------------|--------------------------------|
| Austria     | Consensus         | FPÖ             | Right-wing  | 1949-now <sup>a</sup>          |
|             |                   | BZÖ             | Right-wing  | 2006-2013                      |
|             |                   | TS              | Right-wing  | 2013-2017                      |
|             |                   | Liste Pilz      | Left-wing   | 2017-now                       |
| Belgium     | Consensus         | VB              | Right-wing  | 1978-now                       |
|             |                   | FN              | Right-wing  | 1991-2010                      |
|             |                   | PvdA/PTB        | Left-wing   | 2014-now                       |
| Denmark     | Unitary           | FrP             | Right-wing  | 1973-2001                      |
|             |                   | DFp             | Right-wing  | 1998-now                       |
|             |                   | FK              | Left-wing   | 1987-1988                      |
| Finland     | Unitary           | PS              | Right-wing  | 1966-now                       |
| France      | Majoritarian      | FN              | Right-wing  | 1986-1993; 1997-2002; 2012-now |
| Germany     | Consensus         | DL              | Left-wing   | 1991-now                       |
|             |                   | AfD             | Right-wing  | 2017-now                       |
| Greece      | Majoritarian      | SYRIZA          | Left-wing   | 2004-now                       |
|             |                   | LAOS            | Right-wing  | 2007-2012                      |
|             |                   | ANEL            | Right-wing  | 2012-now                       |
| Iceland     | Unitary           | -               |             |                                |
| Ireland     | Unitary           | SF              | Left-wing   | 1957-1961; 1997-now            |
|             |                   | AAA-PBP         | Left-wing   | 2016-now                       |
| Italy       | Unitary           | M5S             | Centrist    | 2013-now                       |
|             |                   | FI              | Right-wing  | 1994-now                       |
|             |                   | LN              | Right-wing  | 1992-now                       |
|             |                   | ADR             | Right-wing  | 1989-now                       |
| Luxembourg  | Unitary           |                 |             |                                |
| Malta       | Majoritarian      | -               |             |                                |
| Netherlands | Consensus         | CP              | Right-wing  | 1982-1986                      |
|             |                   | CD              | Right-wing  | 1989-1998                      |
|             |                   | SP              | Left-wing   | 1994-now                       |
|             |                   | LN              | Centrist    | 2002-2003                      |
|             |                   | LPF             | Right-wing  | 2002-2006                      |
|             |                   | PVV             | Right-wing  | 2006-now                       |
|             |                   | FvD             | Right-wing  | 2017-now                       |
|             |                   | FrP             | Right-wing  | 1973-1977; 1981-now            |
| Norway      | Unitary           |                 |             |                                |
| Portugal    | Unitary           | -               |             |                                |
| Spain       | Federal           | Podemos         | Left-wing   | 2015-now                       |
| Sweden      | Unitary           | ND              | Right-wing  | 1991-1994                      |
|             |                   | SD              | Right-wing  | 2010-now                       |
|             |                   | APS/FPS         | Right-wing  | 1991-1999                      |
|             |                   | SVP             | Right-wing  | 1971-now <sup>a</sup>          |
| Switzerland | Consensus         | LdT             | Right-wing  | 1991-now                       |
|             |                   | UKIP            | Right-wing  | 2015-2017                      |
|             |                   | SF <sup>b</sup> | Left-wing   | 1955-1959; 1983-1987; 1997-now |

Adapted from Otjes and Louwerse (2015) and Lijphart (1999) with recent additions

<sup>a</sup> Not right-wing populist the entire period

<sup>b</sup> Absentionist

## Appendix B: Alternative Model Specifications

The specific choice of indicators for our two dimensions leaves some room for debate, as with most scaling exercises. The Scrutiny dimension includes an indicator of parliamentary voting on government bills. Some observers might object that this is not truly a form of parliamentary activity comparable to asking written or oral questions. While we disagree with such a view, we re-ran the analysis without this indicator (see Table B1). The results are similar to the model presented in Table 4, but, importantly, the coefficient for Populism slightly decreases in size, while its standard error increases, resulting in a lower level of significance ( $p = .07$ ).

The Policy-Making dimension contains the number of initiatives as one of its components. This variable correlates relatively weakly with the other two variables included in this dimension. If we exclude Initiatives Cronbach's alpha increases from 0.63 to 0.82. When using this alternative dimension, we find a similar effect of populism on policy-making (see Table A1) as in the main analysis. The effect of populism remains negative and significant ( $p < .001$ ).

The Policy-Making dimension also contains the number of Motions as a component. One could argue that this is a relatively 'inexpensive' tool compared to initiating a bill or proposing an amendment. Therefore, populist parties might introduce many motions but do not really use any of the more time-consuming instruments. If we exclude Motions from the 'Policy-Making' scale, we find an effect of Populism ( $b = -0.80$ ) is comparable in size to the original model ( $b = -0.66$ ) and remains statistically significant ( $p < .01$ ). The effect of populism is not weakened by the inclusion of motions in the policy-making dimension.

*Table B1: Alternative Regression Models of Opposition Activity*

|                               | Scrutiny without<br>Voting | Policy-Making<br>without<br>Initiatives | Policy-Making<br>without Motions |
|-------------------------------|----------------------------|-----------------------------------------|----------------------------------|
| Intercept                     | 1.71<br>(1.28)             | 4.25***<br>(0.51)                       | 3.26***<br>(0.49)                |
| Populism                      | 0.31<br>(0.21)             | -0.72***<br>(0.18)                      | -0.80**<br>(0.24)                |
| Party Size (log)              | -0.81<br>(0.43)            | -1.22***<br>(0.33)                      | -0.26<br>(0.42)                  |
| Government History            | 0.73<br>(1.34)             | -0.53<br>(0.99)                         | -0.69<br>(1.06)                  |
| L-R Distance to<br>Government | 0.49*<br>(0.21)            | -0.08<br>(0.15)                         | -0.23<br>(0.21)                  |
| Trend                         | 0.16**<br>(0.05)           | 0.27***<br>(0.05)                       | 0.20***<br>(0.05)                |
| R <sup>2</sup>                | 0.39                       | 0.64                                    | 0.37                             |
| Adj. R <sup>2</sup>           | 0.31                       | 0.59                                    | 0.29                             |
| Num. obs.                     | 42                         | 42                                      | 42                               |

Ordinary Least Squares Regression coefficients with robust standard errors in parentheses. \*\*\*  $p < 0.001$ , \*\*  $p < 0.01$ , \*  $p < 0.05$
